# Supplementary material
Source: PubMed Central journal article supplement (PMC4207479)

# Supplementary Figure 2

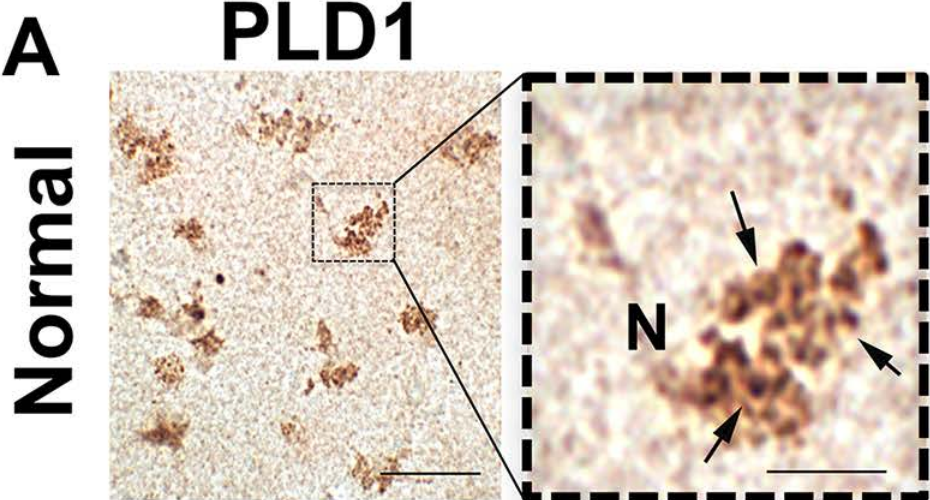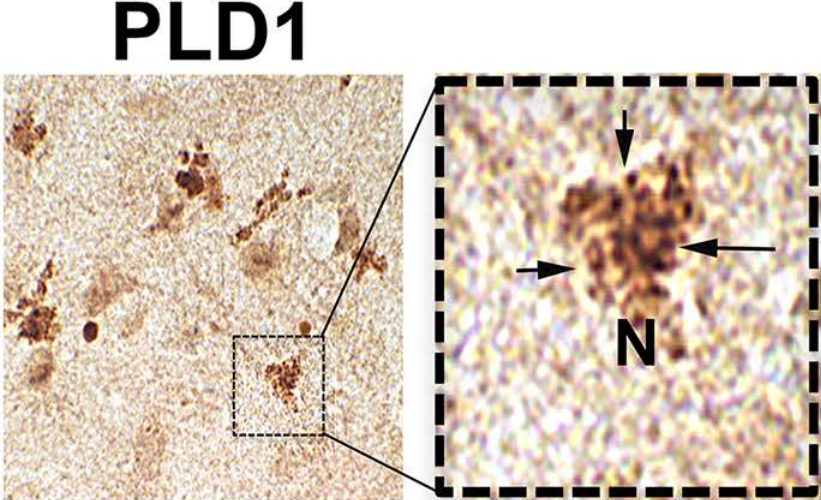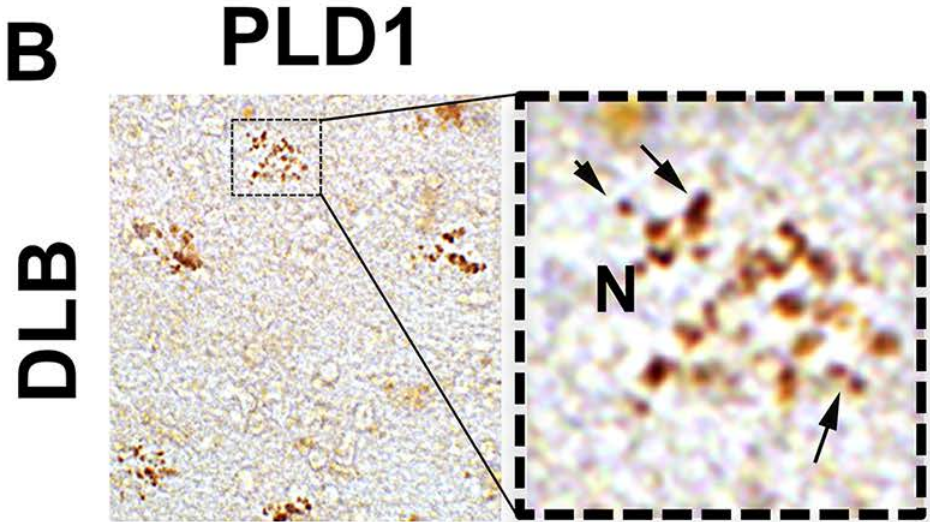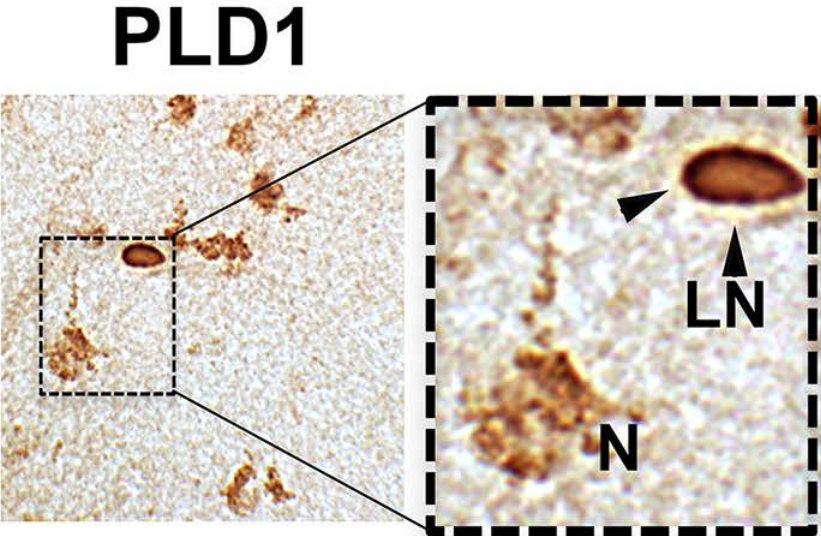

Supplement: cdd201430x2.pdf [file cdd201430x2.pdf]
